# Supplementary material
Source: PubMed Central journal article supplement (PMC4532579)
Supplement: NIHMS693762-supplement.pdf [file NIHMS693762-supplement.pdf]

## Supplemental data files

Figure S1. Sequence alignments (Clustal Omega) and structural predictions (PsiPred) of the human nAChR subunits and other representative Cys-loop receptor subunits (Cys-loop indicated in blue). An AChBP (pdb1I9B) is included for the crystal structural reference comparison with the PsiPred predictions for the extracellular domain. The intracellular portions are indicated with a light blue bar, and the highly variable central section is center-justified below. Intron-exon borders are also indicated in red.

Table S1. Percent sequence identity among human intracellular domains.

Table S2. Accession numbers of sequences studied.

Table S3. Human gene locations.

Table S4. ELM analysis of  $\alpha 7$  sequences of multiple species and of all human nAChR subunits.

# Multiple sequence alignment of pentameric ligand-gated Cys-loop ion-channel proteins

## Extracellular domain of mature protein

CLUSTAL O(1.2.1) multiple sequence alignment

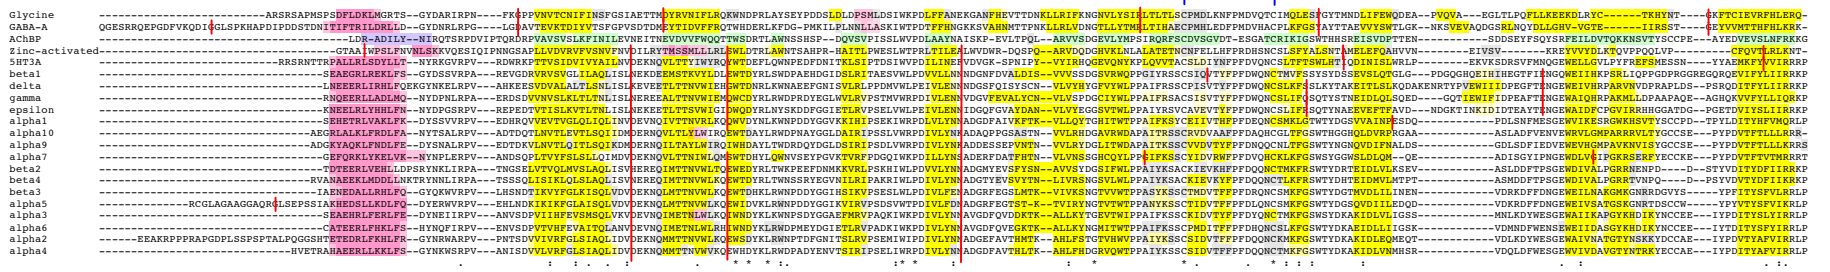

## Transmembrane and intracellular perimembrane domains

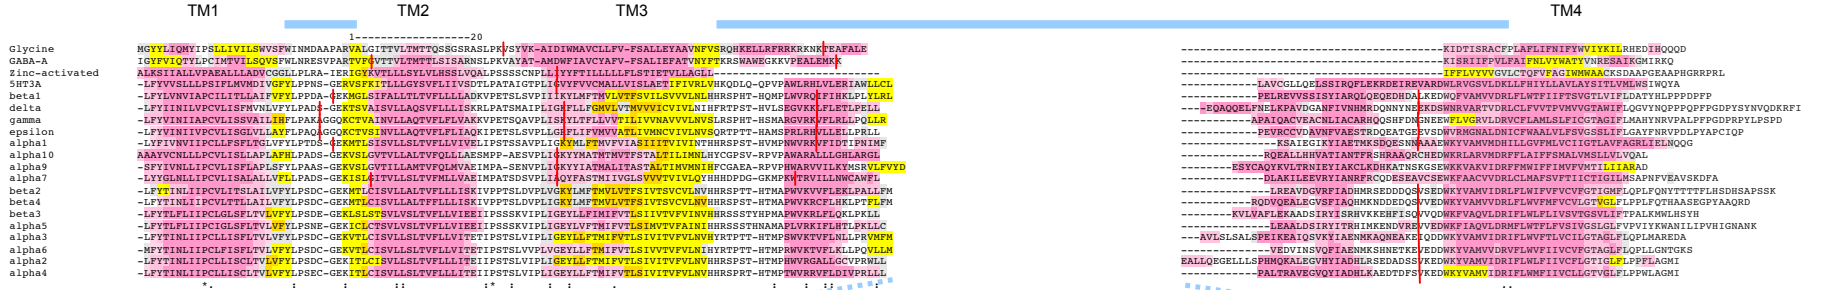

## Central loop of intracellular domain

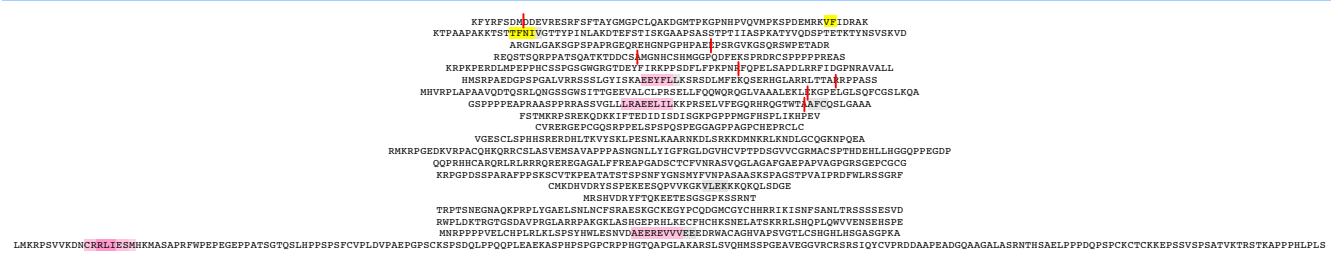

### COLOR CODE

- AChBP helix
- AChBP strand
- helix--
- helix 50-75% confidence
- helix <50% confidence
- strand--
- strand less confidence next to helix
- strand less confidence next to coil
- coil--
- coil predicted with less confidence

### Intracellular domain

\* : . Clustal sequence conservation marks

| Intron-Exon border

|                       |                |               |                  |              |              |              |                |              |               |                |               |               |              |              |              |               |               |               |               |               |
|-----------------------|----------------|---------------|------------------|--------------|--------------|--------------|----------------|--------------|---------------|----------------|---------------|---------------|--------------|--------------|--------------|---------------|---------------|---------------|---------------|---------------|
|                       | <b>Glycine</b> | <b>GABA-A</b> | <b>Zinc-act.</b> | <b>5HT3A</b> | <b>beta1</b> | <b>delta</b> | <b>epsilon</b> | <b>gamma</b> | <b>alpha1</b> | <b>alpha10</b> | <b>alpha9</b> | <b>alpha7</b> | <b>beta2</b> | <b>beta4</b> | <b>beta3</b> | <b>alpha5</b> | <b>alpha3</b> | <b>alpha6</b> | <b>alpha2</b> | <b>alpha4</b> |
| <b>Glycine</b>        | 100.00         |               |                  |              |              |              |                |              |               |                |               |               |              |              |              |               |               |               |               |               |
| <b>GABA-A</b>         | 10.53          | 100.00        |                  |              |              |              |                |              |               |                |               |               |              |              |              |               |               |               |               |               |
| <b>Zinc-activated</b> | 12.50          | 50.00         | 100.00           |              |              |              |                |              |               |                |               |               |              |              |              |               |               |               |               |               |
| <b>5HT3A</b>          | 9.62           | 8.57          | 40.00            | 100.00       |              |              |                |              |               |                |               |               |              |              |              |               |               |               |               |               |
| <b>beta1</b>          | 11.86          | 15.28         | 20.00            | 14.94        | 100.00       |              |                |              |               |                |               |               |              |              |              |               |               |               |               |               |
| <b>delta</b>          | 16.33          | 17.57         | 16.67            | 12.50        | 23.81        | 100.00       |                |              |               |                |               |               |              |              |              |               |               |               |               |               |
| <b>epsilon</b>        | 13.64          | 12.68         | 0.00             | 15.49        | 29.87        | 35.90        | 100.00         |              |               |                |               |               |              |              |              |               |               |               |               |               |
| <b>gamma</b>          | 12.24          | 10.81         | 6.25             | 12.00        | 26.14        | 26.40        | 37.93          | 100.00       |               |                |               |               |              |              |              |               |               |               |               |               |
| <b>alpha1</b>         | 13.33          | 13.04         | 0.00             | 16.30        | 33.33        | 27.78        | 21.13          | 25.33        | 100.00        |                |               |               |              |              |              |               |               |               |               |               |
| <b>alpha10</b>        | 13.04          | 5.00          | 41.67            | 25.71        | 18.92        | 18.46        | 20.97          | 13.85        | 14.93         | 100.00         |               |               |              |              |              |               |               |               |               |               |
| <b>alpha9</b>         | 13.33          | 14.93         | 14.29            | 16.05        | 13.83        | 8.70         | 12.64          | 8.70         | 16.87         | 29.73          | 100.00        |               |              |              |              |               |               |               |               |               |
| <b>alpha7</b>         | 21.05          | 12.99         | 11.76            | 23.81        | 20.62        | 18.45        | 17.53          | 17.76        | 23.53         | 25.00          | 12.62         | 100.00        |              |              |              |               |               |               |               |               |
| <b>beta2</b>          | 16.33          | 20.00         | 23.53            | 14.46        | 29.67        | 27.72        | 27.66          | 23.81        | 25.00         | 23.08          | 13.64         | 23.81         | 100.00       |              |              |               |               |               |               |               |
| <b>beta4</b>          | 18.87          | 16.22         | 20.00            | 16.87        | 28.00        | 24.75        | 23.66          | 23.36        | 33.72         | 24.62          | 10.75         | 23.42         | 44.54        | 100.00       |              |               |               |               |               |               |
| <b>beta3</b>          | 16.95          | 16.95         | 14.29            | 20.00        | 23.26        | 28.36        | 19.35          | 21.92        | 24.29         | 20.31          | 14.12         | 16.28         | 37.33        | 30.23        | 100.00       |               |               |               |               |               |
| <b>alpha5</b>         | 13.79          | 17.24         | 0.00             | 21.21        | 28.95        | 31.82        | 22.58          | 26.47        | 23.08         | 18.75          | 10.13         | 19.74         | 39.13        | 34.72        | 53.09        | 100.00        |               |               |               |               |
| <b>alpha3</b>         | 19.61          | 14.67         | 4.76             | 13.58        | 28.00        | 25.00        | 26.00          | 20.91        | 37.97         | 21.31          | 17.98         | 21.59         | 28.57        | 29.70        | 24.66        | 22.73         | 100.00        |               |               |               |
| <b>alpha6</b>         | 18.37          | 11.11         | 9.52             | 16.88        | 23.40        | 25.00        | 29.17          | 22.43        | 31.25         | 23.81          | 16.48         | 21.11         | 28.12        | 28.00        | 25.33        | 23.88         | 45.16         | 100.00        |               |               |
| <b>alpha2</b>         | 15.00          | 20.29         | 13.79            | 18.75        | 29.41        | 23.16        | 25.00          | 19.80        | 29.87         | 30.59          | 14.14         | 26.47         | 36.17        | 35.92        | 32.56        | 28.57         | 30.53         | 25.53         | 100.00        |               |
| <b>alpha4</b>         | 27.03          | 25.84         | 28.26            | 21.30        | 34.13        | 22.05        | 23.08          | 23.88        | 37.50         | 26.09          | 18.33         | 28.47         | 42.19        | 36.92        | 33.33        | 32.47         | 28.99         | 25.20         | 40.29         | 100.00        |

|         | <b>human</b><br><i>Homo sapiens</i> | <b>bovine</b><br><i>Bos taurus</i> | <b>rat</b><br><i>Rattus norvegicus</i> | <b>chick</b><br><i>Gallus gallus</i> | <b>frog</b><br><i>Xenopus spp.</i> | <b>zebrafish</b><br><i>Danio rerio</i> |
|---------|-------------------------------------|------------------------------------|----------------------------------------|--------------------------------------|------------------------------------|----------------------------------------|
| alpha1  | Q53SH4                              | P02709                             | P25108                                 | P09479                               | P22456                             | BC081554*                              |
| alpha2  | Q15822                              | F1N4T3                             | P12389                                 | P09480                               | F6YPK2                             | Q7ZZP7                                 |
| alpha3  | P32297                              | Q07263                             | P04757                                 | P09481                               |                                    | F8W5I4                                 |
| alpha4  | P43681                              | E1BHK0                             | P09483                                 | P09482                               | A9JRM3                             | Q0PJT8                                 |
| alpha5  | P30532                              | Q8SPU7                             | P20420                                 | P26152                               | F7ELS1                             | Q567Y7                                 |
| alpha6  | Q15825                              | F1MQ06                             | P43143                                 | P49581                               | F6SXF6                             | Q0PJT9                                 |
| alpha7  | P36544                              | P54131                             | Q05941                                 | P22770                               | F6Q7N3                             | Q800C7                                 |
| alpha9  | Q9UGM1                              | F1MDD1                             | P43144                                 | Q9PTS8                               | F6VVP3                             | F1Q7M1                                 |
| alpha10 | Q9GZZ6                              | F1MF20                             | Q9JLB5                                 | Q9I8C7                               | F6ZMM6                             | R4GF05                                 |
| beta1   | P11230                              | P04758                             | P25109                                 |                                      | P49579                             | G1FMP7                                 |
| beta2   | P17787                              | F1MUN1                             | P12390                                 | P09484                               | A4IIS6                             |                                        |
| beta3   | Q05901                              | F1MF30                             | P12391                                 | P43679                               | Q7SY88                             | Q7ZZP6                                 |
| beta4   | P30926                              | Q8SPU6                             | P12392                                 | P26153                               | F7ERN7                             |                                        |
| gamma   | P07510                              | P13536                             | P18916                                 | P02713                               | P05376                             | G1FMP9                                 |
| delta   | Q07001                              | P04759                             | P25110                                 | F1NJ26                               | P09628                             | Q5BLJ3                                 |
| epsilon | Q04844                              | P02715                             | P09660                                 | -----                                | P49580                             | G1FMQ0                                 |
| 5HT3A   | P46098                              | F1N4Y2                             | P35563                                 | F1NGS5                               | F6YC54                             | F1QQX3                                 |

| <b>Genbank accession</b> | <b>gene</b> | <b>subunit</b> | <b>chromosome map</b> |
|--------------------------|-------------|----------------|-----------------------|
| NM_006529                | GLRA3       | Glycine        | 4q34.1                |
| NM_000808                | GABRA3      | GABA-A         | Xq28                  |
| AF364899                 | AChBP       | AChBP          |                       |
| NM_180990                | ZACN        | Zinc-activated | 17q25.3               |
| NM_000869                | HTR3A       | 5HT3A          | 11q23.1               |
| NM_000747                | CHRNB       | beta1          | 17p13.1               |
| NM_000751                | CHRNA10     | delta          | 2q37.1                |
| NM_005199                | CHRNA10     | gamma          | 2q37.1                |
| NM_000080                | CHRNA10     | epsilon        | 17p13.2               |
| NM_000079                | CHRNA10     | alpha1         | 2q31.1                |
| NM_020402                | CHRNA10     | alpha10        | 11p15.5               |
| NM_017581                | CHRNA9      | alpha9         | 4p14                  |
| NM_000746                | CHRNA7      | alpha7         | 15q14                 |
| NM_000748                | CHRNA2      | beta2          | 1q21.3                |
| NM_000750                | CHRNA4      | beta4          | 15q24                 |
| NM_000749                | CHRNA3      | beta3          | 8p11.2                |
| NM_000745                | CHRNA5      | alpha5         | 15q24                 |
| NM_000743                | CHRNA3      | alpha3         | 15q24                 |
| NM_004198                | CHRNA6      | alpha6         | 8p11.21               |
| NM_000742                | CHRNA2      | alpha2         | 8p21                  |
| NM_000744                | CHRNA4      | alpha4         | 20q13.33              |
